# Supplementary material for: Facile fabrication of highly omniphobic and self-cleaning surfaces based on water mediated fluorinated nanosilica aggregation
Source: Royal Society of Chemistry journal article supplement (doi:10.1039/c6ra13367c), 2016-01-01
Supplement: c6ra13367c8.pdf [file c6ra13367c8.pdf]

## Electronic Supplementary information (ESI)

### Facile Fabrication of Highly Omniphobic and Self-cleaning Surface

### Based on Water Mediated Fluorinated Nanosilica Aggregation

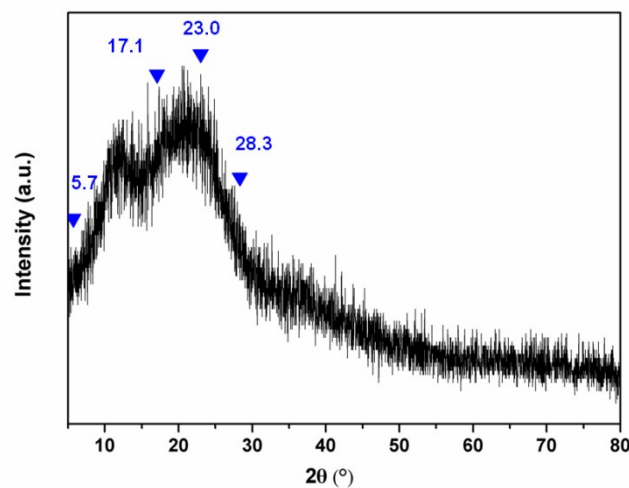

Figure S1. The XRD measurement of the modified nanosilica.

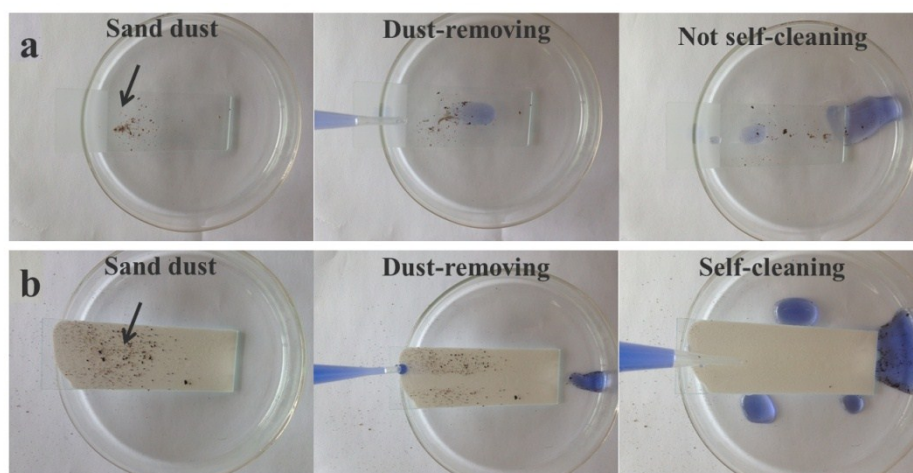

Figure S2. Process images showing the self-cleaning property of blank sample (a) and omniphobic surface (b).

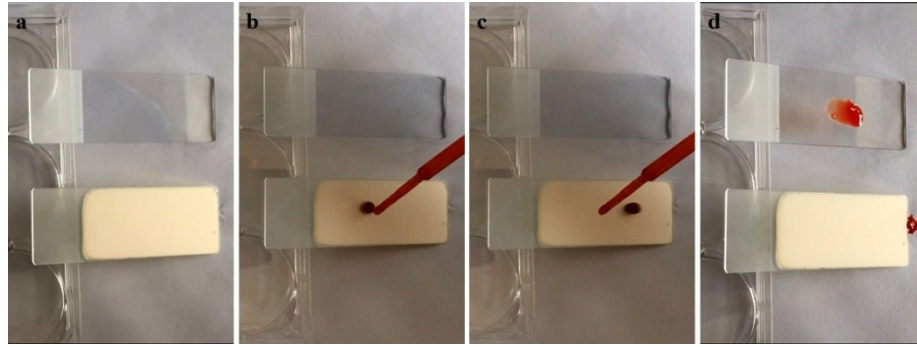

**Figure S3.** Process images of a drop of heparinized human blood rolling down on blank sample and omniphobic surface. The tilting angle of the glass slides was about 20°.
